# Supplementary material for: Genomic signatures among Oncorhynchus nerka ecotypes to inform conservation and management of endangered Sockeye Salmon
Source: PubMed Central journal article supplement (PMC5108219; doi:10.1111/eva.12412), 2016-10-21

**Figure S1.** Boxplots for observed heterozygosity calculated for RAD loci localized to *O. nerka* linkage groups 12 (A) and 20 (B) in the Redfish - Anadromous (RFL-A) and Redfish - Resident (RFL-R) populations. Boxplots are presented for those that were ('yes' on x-axis) or were not ('no' on x-axis) outlier loci.

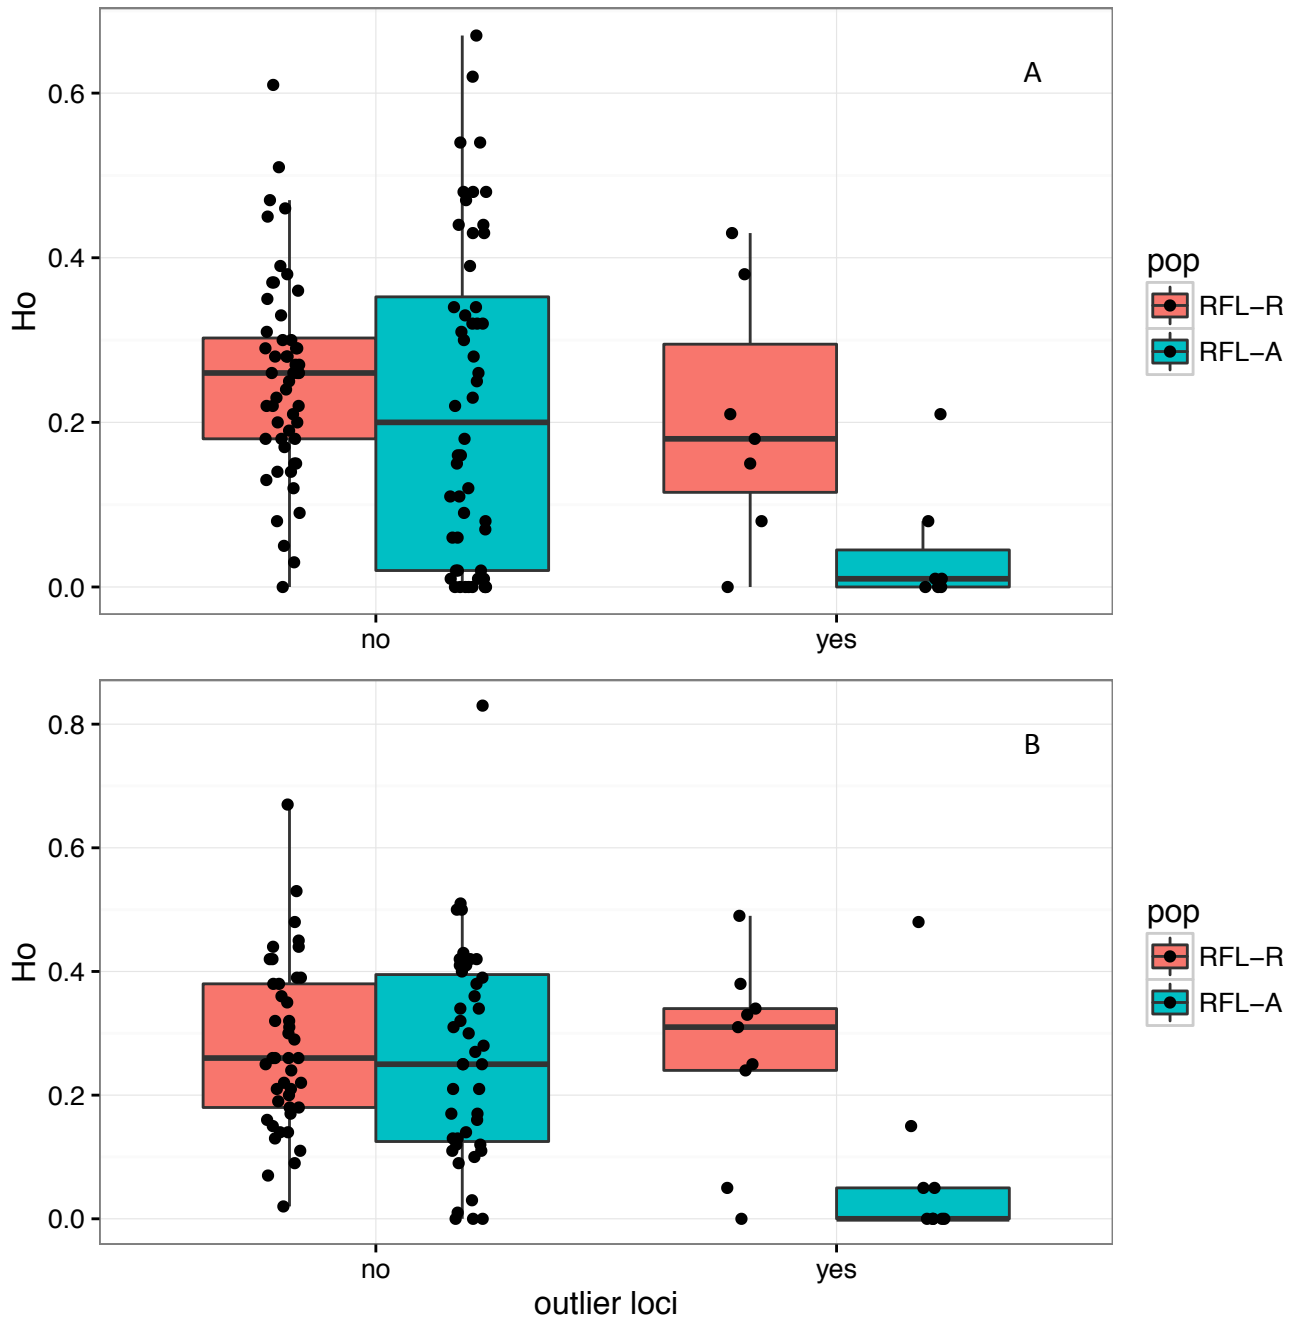

**Figure S2.** Mean Q plots for each individual with K=3 clusters in fastStructure. The three colors represent the membership in each of three colors, while each vertical line represents an individual in each of the three populations.

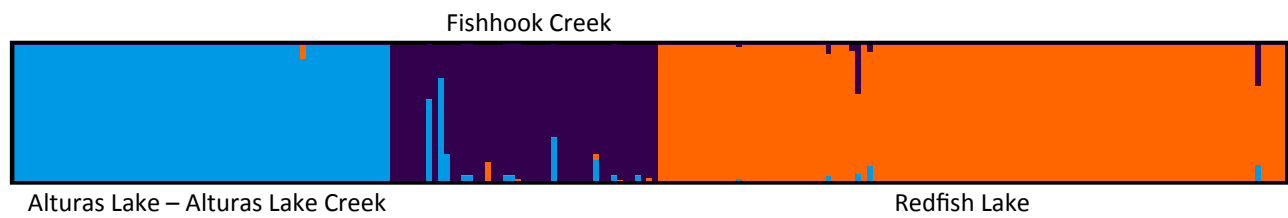

**Figure S3.** QQ plots from mixed linear model in GAPIT for genome-wide association analyses. Three analyses were run: 1) all collections (n = 211), where the model included PC1 and sex, 2) the Alturas collections only (n = 63), where the model included sex, and 3) the Redfish collections only (n = 148), where the model included PC1, PC2 and sex. All models included the uncompressed kinship matrix.

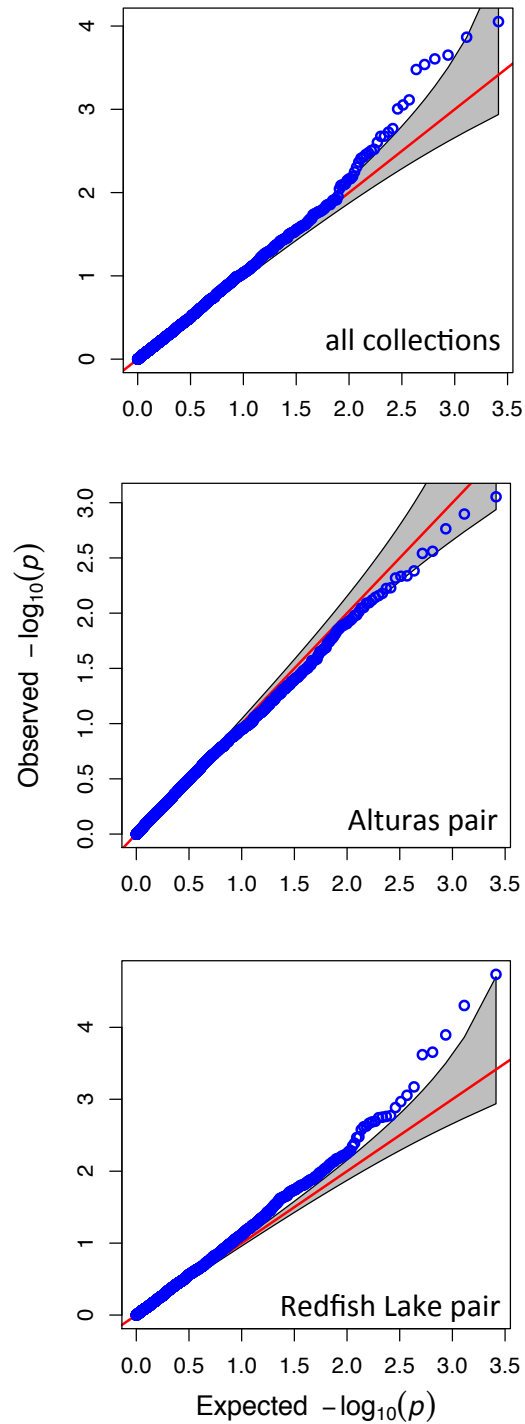

**Figure S4.** Proportion of variation explained (PVE) by top subsets of markers in the random forest. Top subsets are proportion of the total  $n = 2593$  markers. The top panel shows the full range of top subsets, and the bottom panel is a zoomed snapshot of the PVE from the top panel for 0-10% top subsets.

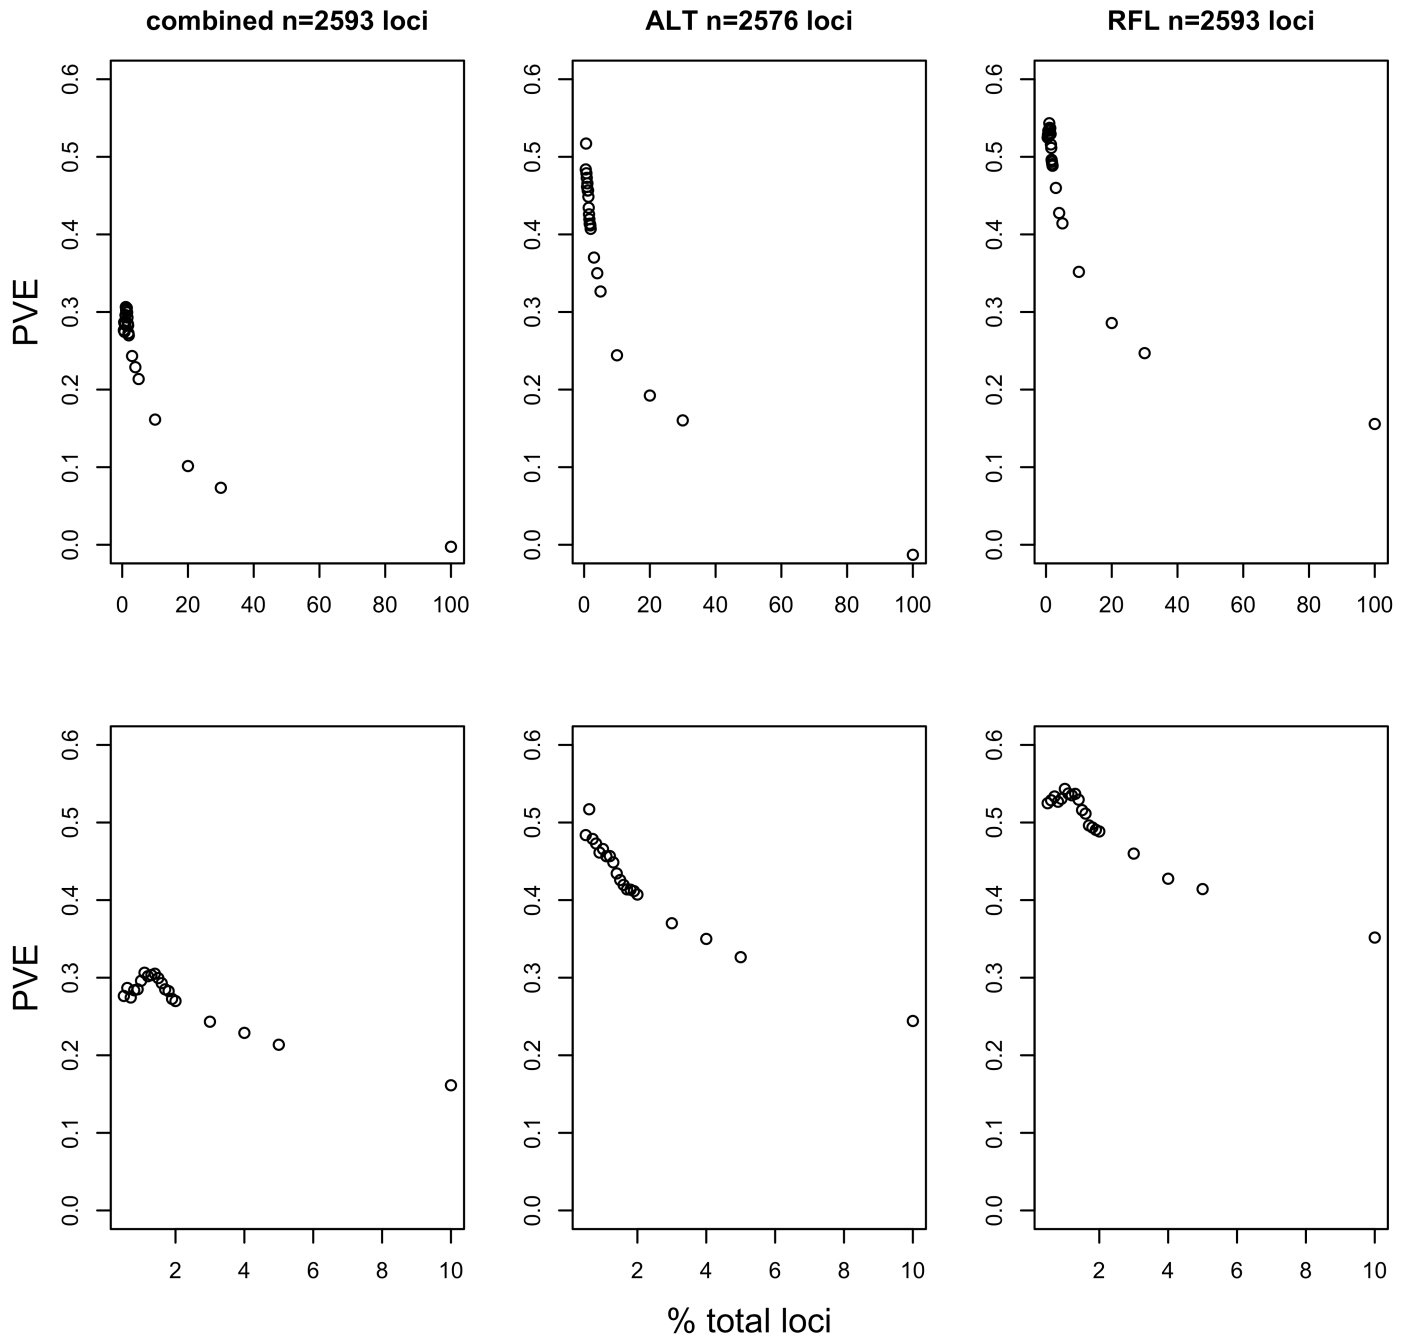

**Figure S5.** Average proportion of variation explained by the top 77, 28, and 66 loci in the backwards purging model selection for random forest in the combined, Alturas, and Redfish collections, respectively.

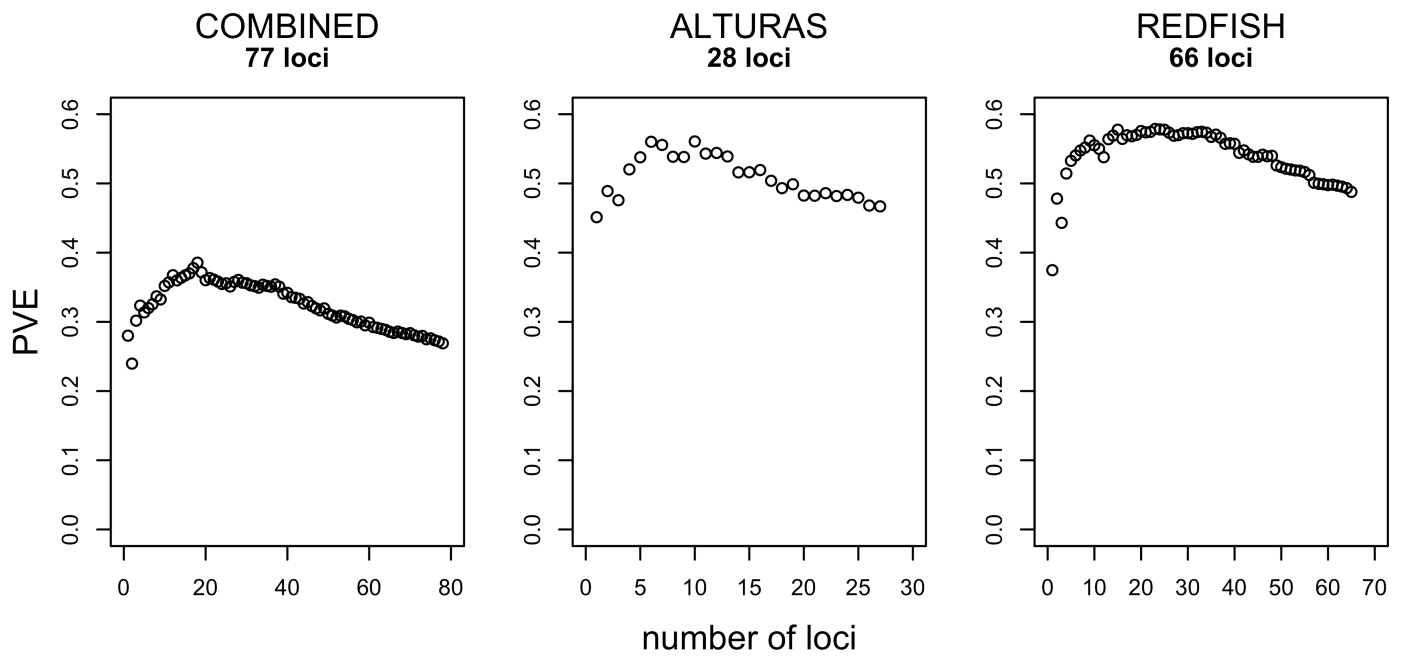

**Figure S6.** Heatmap of pairwise linkage disequilibrium ( $r^2$ ) between all SNPs significant in at least one model tested in this study.

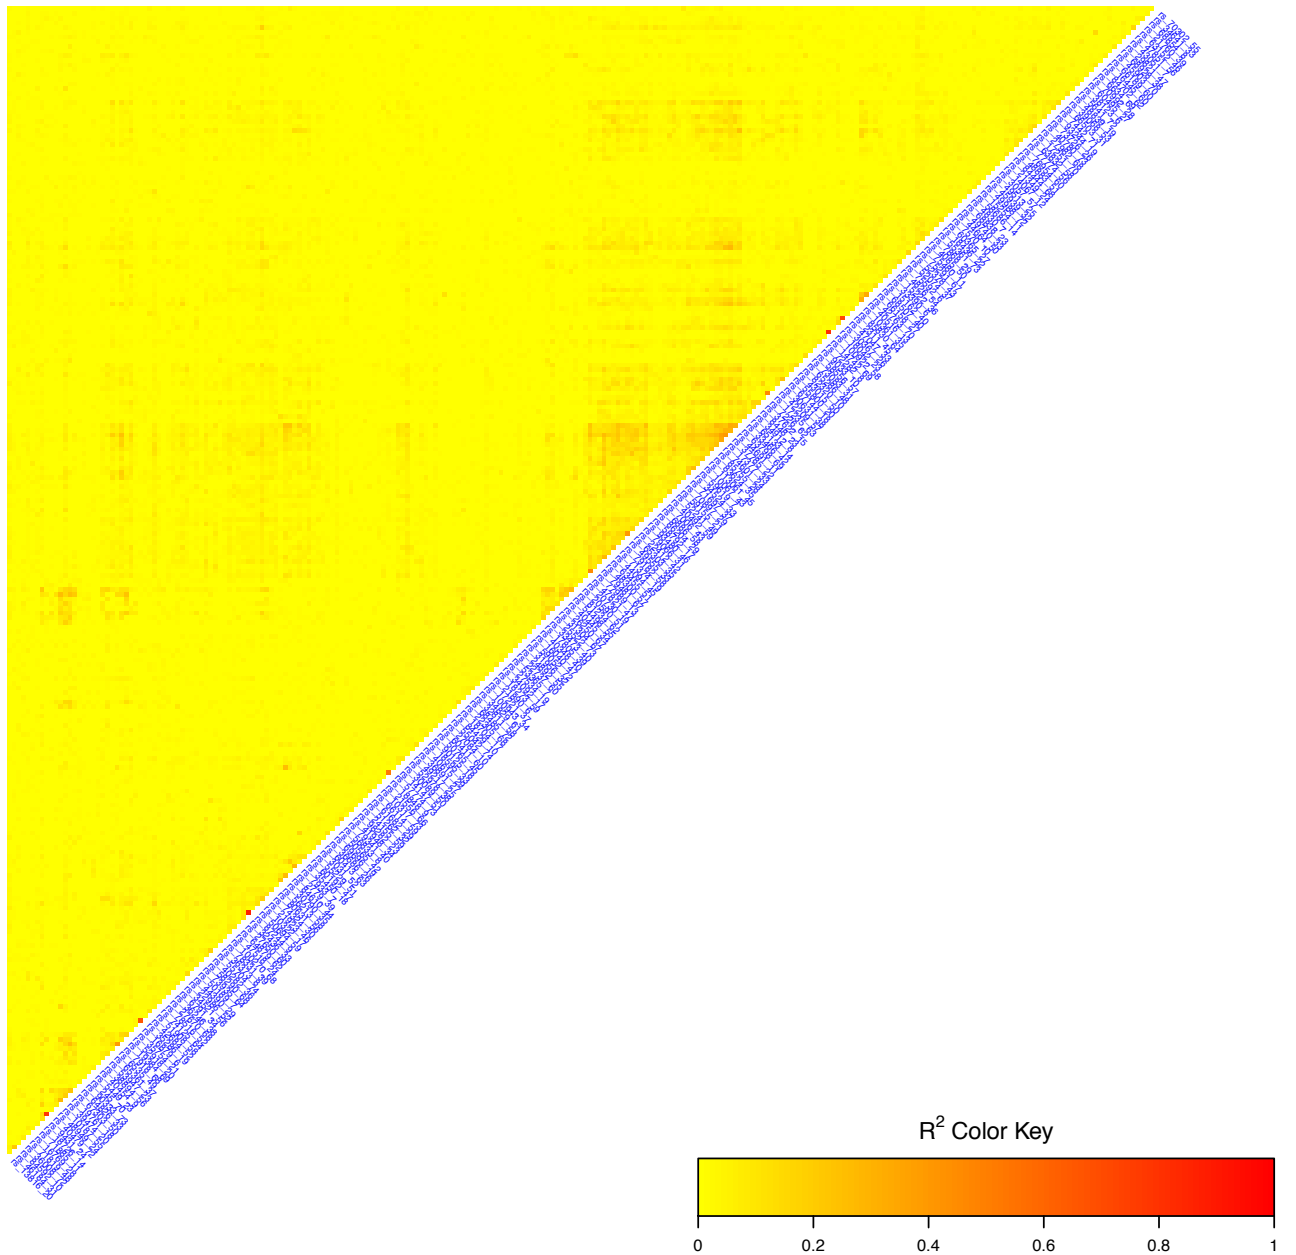

Supplement: EVA-9-1285-s001.pdf [file EVA-9-1285-s001.pdf]
