# Supplementary material for: Genomic signatures among Oncorhynchus nerka ecotypes to inform conservation and management of endangered Sockeye Salmon
Source: PubMed Central journal article supplement (PMC5108219; doi:10.1111/eva.12412), 2016-10-21
Supplement: EVA-9-1285-s003.pdf [file EVA-9-1285-s003.pdf]

## **Appendix S1: Identification of Alturas Lake Origin Returning Adults**

### *Anadromous Adult Returns*

Anadromous adults that return to the Sawtooth Valley basin are either trapped at an adult trap on Redfish Lake Creek or the Sawtooth Fish Hatchery weir on the upper Salmon River (Figure 1; Peterson et al. 2014). Upon trapping, a fin clip is collected along with information regarding gender, length, weight and mark information. For this study, DNA was extracted using a Nexttec DNA isolation kit according to the manufacturer's instructions (<http://www.nexttec.biz>). Following DNA extraction, each sample was amplified with 13 microsatellite loci: One103, One104, One108, One111, One112, One114, One115, Oki1, One13, One110, One106, Omy77, and Ots103. (Scribner et al. 1996; Smith et al. 1998; Beacham et al. 1998; Cairney et al. 2000; Olsen et al. 2000; Perry et al. 2001; Rexroad et al. 2001). Multiplex reactions were carried out for four combinations of loci (contact the authors for PCR concentrations and thermocycler profiles). Following amplification, PCR fragments were diluted at 1:30 ratio and size fractionated using an ABI3730 capillary DNA sequencer and internal size standard (GS500) genotypes were scored by GeneMapper software version 3.0 (Applied Biosystems) Individuals representing ~10% of the sampled fish were re-amplified and scored a second time. After each anadromous fish was genotyped with a minimum of 9 loci, individuals with alleles that were not found in the captive broodstock were flagged.

### *Reference Baseline*

Genetic assignment tests were used to assign anadromous fish back to the baseline. For this analysis, the reference baseline included 4,072 *O. nerka* from the captive broodstock program and the Sawtooth Valley lakes (Table 1). This reference baseline was generated from a number of different collection

types (creel, trawl, creek spawners, captive broodstock) taken as part of research, monitoring and evaluation efforts for the Snake River Sockeye Salmon program and is updated annually.

**Table 1:** Collection Information including collection group, year sampled and sample size

| Collection                                                            | Years       | Sample Size |
|-----------------------------------------------------------------------|-------------|-------------|
| Fishhook Creek Kokanee                                                | 2005 - 2013 | 321         |
| Warm Lake Kokanee                                                     | 2003        | 40          |
| Pettit Lake Kokanee                                                   | 2000 - 2010 | 42          |
| Deadwood Reservoir Kokanee                                            | 2007 - 2008 | 55          |
| Stanley Lake Kokanee                                                  | 2005, 2010  | 36          |
| Alturas Lake Kokanee                                                  | 2005-2013   | 1078        |
| Redfish Lake Sockeye Salmon Captive Broodstock and Anadromous Returns | 2000 - 2012 | 2500        |
|                                                                       | Total       | 4,072       |

The software GeneClass 2.0h (Piry et al. 2004) was used to determine the self-classification rate of the collections within the baseline. Both a Bayesian assignment test (Rannala and Mountain 1997) and a frequency based test (Paetkau et al. 1995) were used to confirm identity. Individual assignments to a population with greater than 90% probability were accepted. For the frequency assignment test, a frequency of 0.01 was used to adjust the allele frequencies in the baseline populations if it was present in the tested individual but not the population. Overall, high self-assignment rates were observed indicating high differentiation among populations within the baseline and the ability to correctly assign individuals back to their population of origin (Table 2).

**Table 2:** Self-classification assignments of the reference baseline using both the a) frequency based assignment test and b) Bayesian assignment test.

a) Frequency Test Results

| Collection     | Broodstock | Alturas | Deadwood | Pettit | Stanley | Warm Lake | Fishhook Creek | Not assigned | % Self Assignment |
|----------------|------------|---------|----------|--------|---------|-----------|----------------|--------------|-------------------|
| Broodstock     | 2495       |         |          |        |         |           |                | 5            | 99%               |
| Alturas        |            | 869     |          |        |         |           | 20             | 189          | 80%               |
| Deadwood       |            |         | 52       |        |         |           |                | 3            | 95%               |
| Pettit         |            |         |          | 39     |         |           |                | 3            | 90%               |
| Stanley        |            |         |          |        | 35      |           |                | 1            | 97%               |
| Warm           |            |         |          |        |         | 40        |                |              | 100%              |
| Fishhook Creek |            | 2       |          |        |         |           | 285            | 34           | 89%               |

b) Bayesian Test Results

| Collection     | Broodstock | Alturas | Deadwood | Pettit | Stanley | Warm Lake | Fishhook Creek | Not assigned | % Self Assignment |
|----------------|------------|---------|----------|--------|---------|-----------|----------------|--------------|-------------------|
| Broodstock     | 2498       |         |          |        |         |           |                | 2            | 99%               |
| Alturas        |            | 999     |          |        |         |           | 11             | 68           | 93%               |
| Deadwood       |            |         | 55       |        |         |           |                |              | 100%              |
| Pettit         |            | 1       |          | 39     |         |           | 1              | 1            | 90%               |
| Stanley        |            |         | 2        |        | 34      |           |                |              | 94%               |
| Warm           |            |         |          |        |         | 40        |                |              | 100%              |
| Fishhook Creek |            | 2       |          |        |         |           | 293            | 26           | 91%               |

*Detection of Alturas Lake Individuals*

Given the high self-assignment rates back to the baseline, both assignment tests were used to assign anadromous adults back to the baseline *O. nerka*. As stated above, anadromous fish returning from 2008 – 2010 were genotyped and 17 fish assigned to the Alturas Lake population (Table 3). Two additional samples assigned to either the Alturas Lake population or captive broodstock program, depending on the assignment test and were not included in the subsequent analyses. The software STRUCTURE 2.0 also confirmed population membership of these same anadromous individuals to the kokanee population when using the same reference baseline and forcing the program to allocate

individuals to two clusters (e.g. captive broodstock or Sawtooth Valley Kokanee; data not shown). The FASTSTRUCTURE analysis using the SNP data also confirmed population membership of those individuals retained for population genomic and association analyses (see Figure S1).

**Table 3:** Individuals that assigned to the Alturas Lake population

| Sample            | Probability with Frequency Test | Probability with Bayesian Test |
|-------------------|---------------------------------|--------------------------------|
| OneEAGL08AAN0001  | 99.957                          | 99.951                         |
| OneEAGL09AAN0038  | 97.28                           | 99.990                         |
| OneEAGL09AAN0454  | 84.885                          | 98.118                         |
| OneEAGL10AAN0025* | 99.989                          | 100.00                         |
| OneEAGL10AAN0097  | 99.636                          | 100.00                         |
| OneEAGL10AAN0122  | 99.991                          | 100.00                         |
| OneEAGL10AAN0146* | 97.548                          | 99.991                         |
| OneEAGL10AAN0159  | 81.253                          | 99.999                         |
| OneEAGL10AAN0202  | 99.885                          | 100                            |
| OneEAGL10AAN0235  | 70.861                          | 99.747                         |
| OneEAGL10AAN0270  | 97.251                          | 100                            |
| OneEAGL10AAN0281  | 79.079                          | 99.815                         |
| OneEAGL10AAN0367  | 96.844                          | 96.895                         |
| OneEAGLE10AAN463  | 99.965 (FH)                     | 78.877 (FH)                    |
| OneEAGL10AAN0524  | 99.697                          | 99.700                         |
| OneEAGL10AAN0571  | 99.993                          | 100                            |
| OneEAGL10AAN0582  | 67.603                          | 67.996                         |
| OneEAGL10AAN0608  | 83.131 (FH)                     | 98.665                         |
| OneEAGL10AAN0665  | 99.963                          | 100                            |

\*Two fish that were removed from the RAD sequencing analysis because they were missing >25% genotypes in the filtered SNP set and two fish were removed due to ambiguous assignment as assignment to the Fishhook Creek (FH) resident population

#### References:

Beacham, T. D., L. Margolis and R. J. Nelson. 1998. A comparison of methods of stock identification for sockeye salmon (*Oncorhynchus nerka*) in Barkley Sound, British Columbia, North Pacific Anadromous Fish Commission, Bulletin No. 1: 227-239.

- Cairney, M., J.B. Taggart and B. Hoyheim. 2000. Characterization of microsatellite and minisatellite loci in Atlantic salmon (*Salmo salar* L.) and cross-species amplification in other salmonids. *Molecular Ecology* 9: 2175-2178.
- Olsen, J. B., S. L. Wilson, E. J. Kretschmer, K. C. Jones and J. E. Seeb. 2000. Characterization of 14 tetranucleotide microsatellite loci derived from sockeye salmon. *Molecular Ecology* 9: 2185-2187
- Paetkau, D., W. Calvert, I. Stirling and C. Strobeck. 1995. Microsatellite analysis of population structure in Canadian polar bears. *Molecular Ecology* 4: 347-354.
- Perry, G. M. L., G. J. McDonalds, M. M. Ferguson, R. C. Ganassin and N. C. Bols. 2001. Characterization of rainbow trout cell lines using microsatellite DNA profiling. *Cytotechnology* 37: 143-151.
- Piry, S., A. Alapetite, J.-M. Cornuet, D. Paetkau, L. Baudouin and A. Estoup. 2004. GeneClass2: A Software for Genetic Assignment and First-Generation Migrant Detection. *Journal of Heredity* 95: 536-539.
- Rannala, B. and J. L. Mountain. 1997. Detecting immigration by using multilocus genotypes. *Proceedings of the National Academy of Sciences* 94: 9197-9201.
- Rexroad, C. E., R. L. Coleman, A. M. Martin, W. K. Hershberger and J. Killefer. 2001. Thirty-five polymorphic microsatellite markers for rainbow trout (*Oncorhynchus mykiss*). *Animal Genetics* 32: 317-319.
- Scribner, K. T., J. R. Gust and R. L. Fields. 1996. Isolation and characterization of novel salmon microsatellite loci: cross-species amplification and population genetic applications. *Canadian Journal of Fisheries and Aquatic Sciences* 53: 833-841.
- Smith, C. T., B. F. Koop and R. J. Nelson. 1998. Isolation and characterization of coho salmon (*Oncorhynchus kisutch*) microsatellites and their use in other salmonids. *Molecular Ecology* 7: 1614-1616.
